# Supplementary material
Source: HighWire-hosted journal article supplement (https://erj.ersjournals.com/content/51/3/1702467)
Supplement: inline-supplementary-material-1 [file inline-supplementary-material-1.pdf]

Table S1. Companion tuberculosis drugs administered to patients with multidrug-resistant tuberculosis treated with delamanid and/or bedaquiline

|                              | Total<br>(n=61) | Delamanid<br>alone (n=11) | Bedaquiline<br>alone<br>(n=39) | Both drugs<br>(n=11) | p value |
|------------------------------|-----------------|---------------------------|--------------------------------|----------------------|---------|
| Rifabutin                    | 4 (6.6)         | 1 (9.1)                   | 2 (5.1)                        | 1 (9.1)              | 0.615   |
| Ethambutol                   | 9 (14.8)        | 0 (0)                     | 8 (20.5)                       | 1 (9.1)              | 0.260   |
| Pyrazinamide                 | 26<br>(42.6)    | 5 (45.5)                  | 18 (46.2)                      | 3 (27.3)             | 0.568   |
| Streptomycin                 | 11<br>(18.0)    | 1 (9.1)                   | 9 (23.1)                       | 1 (9.1)              | 0.435   |
| Kanamycin                    | 17<br>(28.3)    | 1 (9.1)                   | 12 (31.6)                      | 4 (36.4)             | 0.328   |
| Amikacin                     | 13<br>(21.3)    | 4 (36.4)                  | 6 (15.4)                       | 3 (27.3)             | 0.250   |
| Capreomycin (or<br>viomycin) |                 |                           |                                |                      |         |
| Cycloserine                  | 48<br>(78.7)    | 9 (81.8)                  | 33 (84.6)                      | 6 (54.5)             | 0.136   |
| Prothionamide                | 46<br>(75.4)    | 9 (81.8)                  | 31 (79.5)                      | 6 (54.5)             | 0.236   |
| Para-aminosalicylic<br>acid  | 27<br>(44.3)    | 5 (45.5)                  | 19 (48.7)                      | 3 (27.3)             | 0.529   |
| Ofloxacin                    | 0               | 0                         | 0                              | 0                    | 0       |
| Levofloxacin                 | 15<br>(24.6)    | 3 (27.3)                  | 10 (25.6)                      | 2 (18.2)             | 1.000   |
| Moxifloxacin                 | 24<br>(39.3)    | 5 (45.5)                  | 18 (46.2)                      | 1 (9.1)              | 0.087   |
| Clarithromycin*              | 14              | 1 (9.1)                   | 7 (17.9)                       | 6 (54.5)             | 0.019   |

|                             |              |          |           |            |       |
|-----------------------------|--------------|----------|-----------|------------|-------|
|                             | (23.0)       |          |           |            |       |
| Amoxicillin-clavulanic acid | 18<br>(29.5) | 1 (9.1)‡ | 9 (23.1)+ | 8 (72.7)+‡ | 0.002 |
| Meropenem                   | 4 (6.6)      | 1 (9.1)  | 2 (5.1)   | 1 (9.1)    | 0.615 |
| Clofazimine*                | 12<br>(19.7) | 1 (9.1)  | 5 (12.8)  | 6 (54.5)   | 0.011 |

Results reported as n (%)

\*+‡Dunn's post hoc test was performed when the result of the Kruskal-Wallis test was significant: \* $p > 0.05$  among groups; +bedaquiline vs both drugs,  $P < 0.05$ ; ‡delamanid vs both drugs,  $P < 0.05$ .

Table S2. Factors related to culture conversion

| Patient characteristic                                   | Culture<br>conversion<br><br>(n = 39) | Persistently<br>positive<br><br>(n = 16) | p value |
|----------------------------------------------------------|---------------------------------------|------------------------------------------|---------|
| Age ≥45 years                                            | 27 (69.2)                             | 11 (68.8)                                | 1.000   |
| Sex, male                                                | 31 (79.5)                             | 14 (87.5)                                | 0.706   |
| Body mass index <18.5 kg/m <sup>2</sup>                  | 13 (33.3)                             | 6 (37.5)                                 | 0.765   |
| Previous treatment history for tuberculosis              | 31 (79.5)                             | 14 (87.5)                                | 0.706   |
| Previously treated for multi-drug resistant tuberculosis | 22 (56.4)                             | 11 (68.8)                                | 0.547   |
| Smear-positive sputum                                    | 24 (61.5)                             | 8 (50.0)                                 | 0.550   |
| Presence of a cavity (or cavities)                       | 16 (41.0)                             | 11 (68.8)                                | 0.080   |
| Bilateral disease                                        | 29 (74.4)                             | 14 (81.3)                                | 0.734   |
| MDR-TB with SLID resistance                              | 9 (23.1)                              | 7 (43.8)                                 | 0.191   |
| MDR-TB with FQ resistance                                | 28 (71.8)                             | 12 (75.0)                                | 1.000   |
| XDR-TB                                                   | 9 (23.1)                              | 5 (31.3)                                 | 0.519   |
| Treatment with new drugs                                 |                                       |                                          |         |

|                                                               |                     |                     |        |
|---------------------------------------------------------------|---------------------|---------------------|--------|
| Delamanid                                                     | 8 (20.5)            | 0 (0)               | 0.162  |
| Bedaquiline                                                   | 24 (61.5)           | 12 (75.0)           |        |
| Both delamanid and bedaquiline                                | 7 (17.9)            | 4 (25.0)            |        |
| Treatment with linezolid                                      | 21 (53.8)           | 10 (62.5)           | 0.765  |
| Treatment with fluoroquinolones                               | 21(53.8)            | 11 (68.6)           | 0.377  |
| Treatment with levofloxacin                                   | 8 (20.5)            | 5 (31.3)            | 0.489  |
| Treatment with moxifloxacin                                   | 15 (38.5)           | 6 (37.5)            | 1.000  |
| Duration of treatment with delamanid and/or bedaquiline, days | 173.0 (167.0-190.0) | 167.0 (129.5-226.0) | 0.168* |

Results reported as n (%) or median (interquartile range).

FQ, fluoroquinolone; MDR-TB, multidrug-resistant tuberculosis, SLID, second-line injectable drugs; XDR-TB, extensively drug-resistant tuberculosis
